# Supplementary material
Source: Elsevier journal article supplement (https://www.sciencedirect.com/science/article/pii/S2173572718302194)
Supplement: mmc1 [file S2173572718302194:mmc1.pdf]

## MATERIAL SUPLEMENTARIO

**TABLA 1E:** Cálculo del tiempo disponible de una botella de aire comprimido.

**Ley de Boyle – Mariotte**  $P_b V_b / T_1 = P_A V_A / T_2$

**Tiempo de disponible de la botella:**  $V_b \times P_b = V_A$

$P_b$ : Presión de la botella (Bar),  $V_b$ : Volumen (litros) de la botella,  $T_1, T_2$ : temperatura constante,  $P_A$ : Presión atmosférica (1 ATM prácticamente equivalente a 1 bar),  $V_A$ : litros disponibles a presión ambiente, VM: volumen- minuto.

## MATERIAL SUPLEMENTARIO

**TABLA 2E:** Ejemplo de cálculo de necesidades de oxígeno y aire de un paciente ECMO para un tiempo de traslado determinado (65).  $V_b$ : Volumen (litros) de la botella,  $P_b$ : presión barométrica de la botella, ECMO: extracorporeal Membrane Oxygenation, VM: Volumen- Minuto, Lpm: Litros por minuto,  $V_A$ : litros a presión ambiente, L: litros

---

### EJEMPLO: NECESIDADES DE AIRE/OXÍGENO EN EL PACIENTE ECMO.

#### PARÁMETROS:

- Tiempo de traslado de 180 minutos:
- $V_b$ : 10 l de capacidad;  $P_b$ = 200 bar (presión estándar de llenado máximo)
- ECMO sweep air: 4 lpm,  $FiO_2$ : 1
- Respirador: VM 4 lpm + 0,5 lpm de gasto propio del respirador: 5lpm;  $FiO_2$ : 0,5

$V_A = V_b \times P = 10 \text{ l} \times 200 \text{ bar}$ : 2000 l disponibles.

#### GASTO ECMO:

- Gasto ECMO= 4lpm X 180 m: 720 l de  $O_2$ .

La ECMO gastará el 36% de una botella de 10 l.

#### GASTO RESPIRADOR:

- Gasto Respirador: 5 lpm x 180 m = 900 l.
  - 71% Aire comprimido: 639 l
  - 29%  $O_2$ : 261 l. El respirador gastaría un 13% de una botella de 10 l de  $O_2$ .

Para estos parámetros, serían necesarios 261 litros de oxígeno para la ventilación mecánica y 720 litros para la ECMO. Si cada botella de 10 l tiene 2000 l de oxígeno, dos botellas de 10 l asegurarían más del doble de tiempo del traslado previsto.

---

MATERIAL SUPLEMENTARIO

**TABLA 3E:** tabla de relación Altura- Presión Barométrica-Volumen. Las cabinas de los aviones se encuentran presurizadas a alturas comprendidas entre 5000-8000 ft (Altura de cabina). Los helicópteros suelen volar a alturas máximas de 10500 ft.

| ALTURA PIES | ALTURA METROS | PRESIÓN<br>BAROMÉTRICA | VOLUMEN |
|-------------|---------------|------------------------|---------|
| 0           | 0             | 763                    | 1       |
| 1000        | 305           | 733                    | 1,04    |
| 2000        | 610           | 706                    | 1,08    |
| 3000        | 914           | 681                    | 1,12    |
| 4000        | 1219          | 656                    | 1,16    |
| 5000        | 1524          | 632                    | 1,20    |
| 6000        | 1829          | 609                    | 1,25    |
| 7000        | 2134          | 586                    | 1,30    |
| 8000        | 2428          | 565                    | 1,35    |
| 9000        | 2743          | 542                    | 1,40    |
| 10000       | 3048          | 523                    | 1,45    |
| 11000       | 3353          | 503                    | 1,51    |
| 12000       | 3658          | 483                    | 1,57    |
| 13000       | 3962          | 465                    | 1,64    |
| 14000       | 4267          | 447                    | 1,70    |
| 15000       | 4572          | 429                    | 1,77    |
| 16000       | 4877          | 412                    | 1,85    |
| 17000       | 5182          | 396                    | 1,92    |
| 18000       | 5486          | 380                    | 2,00    |

## MATERIAL SUPLEMENTARIO

**TABLA 4E:** Fisiología del paciente ECMO durante el transporte aéreo. Ejemplo de cálculo sobre el efecto sobre la ventilación y oxigenación a determinada altura (62,63).  
P: presión barométrica; V: volumen; T: temperatura; VM: volumen-minuto.

**EJEMPLO:** Paciente ECMO trasladado en helicóptero a una altura de 10.000 ft.  
Parámetros de la ECMO fijados a nivel del mar (760 mmHg).

1) ¿Qué sweep air (ECMO) y qué Volumen-minuto (respirador) tendrá el paciente a 10.000 ft de altura (3048 m) a una misma temperatura?:

|                                                                                     |                                                                                                                                                                                                                  |
|-------------------------------------------------------------------------------------|------------------------------------------------------------------------------------------------------------------------------------------------------------------------------------------------------------------|
| <b>Ley de Boyle – Mariotte</b><br><br>$P_1 \times V_1 / T_1 = P_2 \times V_2 / T_2$ | <b>PARÁMETROS QUE CONOCEMOS:</b><br>$P_1 = 760 \text{ mmHg}$<br>$P_2 (10.000 \text{ ft}) = 540 \text{ mmHg}$<br>$V_{1A} (\text{sweep air ECMO}): 4 \text{ lpm}$<br>$V_{1B} \text{ VM Respirador}: 5 \text{ lpm}$ |
|-------------------------------------------------------------------------------------|------------------------------------------------------------------------------------------------------------------------------------------------------------------------------------------------------------------|

•  $V_{1A}: 760 \text{ mmHg} \times 4 \text{ lpm} / 540 \text{ mmHg} = 5.6 \text{ lpm}$ .

**El sweep air de la ECMO aumentará a 5,6 lpm a 10.000 ft.**

•  $V_{1B}: 760 \text{ mmHg} \times 5 \text{ lpm} / 540 \text{ mmHg} = 7 \text{ lpm}$ .

**El VM del respirador aumentará a 7 lpm a 10000 ft.**

2) ¿ A cuánto se deberá aumentar la  $\text{FiO}_2$  del respirador para mantener el grado de oxigenación del paciente si nuestro plan de vuelo es a una altura de 10.000 ft?

|                                                      |                                                                                                                                                            |
|------------------------------------------------------|------------------------------------------------------------------------------------------------------------------------------------------------------------|
| $\text{FiO}_{2b} = \text{FiO}_{2a} \times P_a / P_b$ | $P_a = 760 \text{ mmHg}$<br>$P_b (10000 \text{ ft}) = 540 \text{ mmHg}$<br>$\text{FiO}_{2a}(\text{ECMO}): 1$<br>$\text{FIO}_{2a} (\text{Respirador}): 0,6$ |
|------------------------------------------------------|------------------------------------------------------------------------------------------------------------------------------------------------------------|

$\text{FiO}_{2b}: 0,6 \times 760 \text{ mmHg} / 540 \text{ mmHg} (10000 \text{ ft}) = 0,84$ .

**Habrà que aumentar la  $\text{FiO}_2$  de respirador a 0,84 si nuestro plan de vuelo es a una altura de 10.000 ft.**
